# Supplementary material for: Reducing strain on primary healthcare systems through innovative models of care: the impact of direct access physiotherapy for musculoskeletal conditions—an interrupted time series analysis
Source: PubMed Central journal article supplement — Fam Med Community Health. 2024 Sep 24;12(3):e002998. doi: 10.1136/fmch-2024-002998 (PMC11423733; doi:10.1136/fmch-2024-002998), 2024-09-24
Supplement: fmch-12-3-s001.pdf [file fmch-12-3-s001.pdf]

## Supplementary Material

Supplementary Table 1. Included ICD-10 codes

| Code  | Description                                                               |
|-------|---------------------------------------------------------------------------|
| G54.4 | Lumbosacral root disorders, not elsewhere classified                      |
| G55.1 | Nerve root and plexus compressions in intervertebral disc disorders       |
| G55.2 | Nerve root and plexus compressions in spondylosis                         |
| G55.3 | Nerve root and plexus compressions in other dorsopathies                  |
| G55.8 | Nerve root and plexus compressions in other diseases classified elsewhere |
| G83.4 | Cauda equina syndrome                                                     |
| G99.2 | Myelopathy in diseases classified elsewhere                               |
| M40.0 | Postural kyphosis                                                         |
| M40.1 | Other secondary kyphosis                                                  |
| M40.2 | Other and unspecified kyphosis                                            |
| M40.3 | Flatback syndrome                                                         |
| M40.4 | Other lordosis                                                            |
| M40.5 | Lordosis, unspecified                                                     |
| M41.2 | Other idiopathic scoliosis                                                |
| M41.5 | Other secondary scoliosis                                                 |
| M41.8 | Other forms of scoliosis                                                  |
| M41.9 | Scoliosis, unspecified                                                    |
| M43.0 | Spondylolysis                                                             |
| M43.1 | Spondylolisthesis                                                         |
| M43.2 | Other fusion of spine                                                     |
| M43.5 | Other recurrent vertebral subluxation                                     |
| M43.8 | Other specified deforming dorsopathies                                    |
| M43.9 | Deforming dorsopathy, unspecified                                         |
| M47.1 | Other spondylosis with myelopathy                                         |
| M47.2 | Other spondylosis with radiculopathy                                      |
| M47.8 | Other spondylosis                                                         |
| M47.9 | Spondylosis, unspecified                                                  |
| M48.0 | Spinal stenosis                                                           |
| M481  | Ankylosing hyperostosis [Forestier]                                       |
| M482  | Kissing spine                                                             |
| M484  | Fatigue fracture of vertebra                                              |
| M488  | Other specified spondylopathies                                           |
| M489  | Spondylopathy, unspecified                                                |
| M498  | Spondylopathy in other diseases classified elsewhere                      |
| M500  | Cervical disc disorder with myelopathy                                    |
| M501  | Cervical disc disorder with radiculopathy                                 |
| M502  | Other cervical disc displacement                                          |
| M503  | Other cervical disc degeneration                                          |
| M508  | Other cervical disc disorders                                             |
| M509  | Cervical disc disorder, unspecified                                       |
| M510  | Lumbar and other intervertebral disc disorders with myelopathy            |
| M511  | Lumbar and other intervertebral disc disorders with radiculopathy         |

|      |                                                                                              |
|------|----------------------------------------------------------------------------------------------|
| M512 | Other specified intervertebral disc displacement                                             |
| M513 | Other specified intervertebral disc degeneration                                             |
| M514 | Schmorl nodes                                                                                |
| M518 | Other specified intervertebral disc disorders                                                |
| M519 | Intervertebral disc disorder, unspecified                                                    |
| M530 | Cervicocranial syndrome                                                                      |
| M531 | Cervicobrachial syndrome                                                                     |
| M532 | Spinal instabilities                                                                         |
| M533 | Sacrococcygeal disorders, not elsewhere classified                                           |
| M538 | Other specified dorsopathies                                                                 |
| M539 | Dorsopathy, unspecified                                                                      |
| M541 | Radiculopathy                                                                                |
| M542 | Cervicalgia                                                                                  |
| M543 | Sciatica                                                                                     |
| M544 | Lumbago with sciatica                                                                        |
| M545 | Low back pain                                                                                |
| M546 | Pain in thoracic spine                                                                       |
| M548 | Other dorsalgia                                                                              |
| M549 | Dorsalgia, unspecified                                                                       |
| M960 | Pseudarthrosis after fusion or arthrodesis                                                   |
| M961 | Postlaminectomy syndrome, not elsewhere classified                                           |
| M963 | Postlaminectomy kyphosis                                                                     |
| M964 | Postsurgical lordosis                                                                        |
| M966 | Fracture of bone following insertion of orthopaedic implant, joint prosthesis, or bone plate |
| M968 | Other postprocedural musculoskeletal disorders                                               |
| M969 | Postprocedural musculoskeletal disorder, unspecified                                         |
| M991 | Subluxation complex (vertebral)                                                              |
| M993 | Osseous stenosis of neural canal                                                             |
| M994 | Connective tissue stenosis of neural canal                                                   |
| M995 | Intervertebral disc stenosis of neural canal                                                 |
| M996 | Osseous and subluxation stenosis of intervertebral foramina                                  |
| M997 | Connective tissue and disc stenosis of intervertebral foramina                               |

Subgroup outcomes:

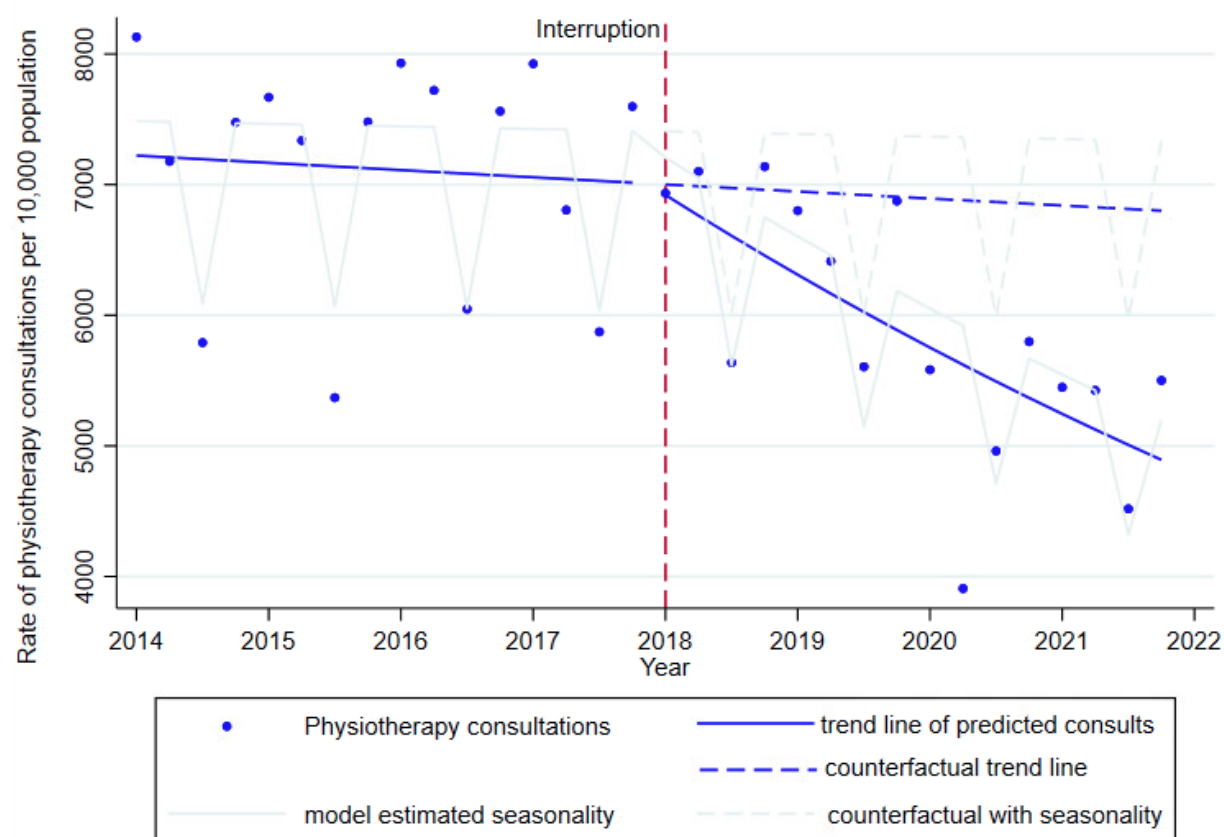

Supplementary figure 1. Rates of physiotherapy MSK consultations in the Lower Education group, before and after the introduction of Direct Access Physiotherapy in Norway

Supplementary table 2. Segmented regression analysis of the introduction of Direct Access Physiotherapy on the rates of physiotherapy MSK consultations in the lower education group, per 10,000 population in Norway.

| Variable                                       | Coefficient | Standard Error | z statistic | P-Value | 95% Confidence Interval |         |
|------------------------------------------------|-------------|----------------|-------------|---------|-------------------------|---------|
| <b>change over time</b>                        | -66.35      | 10.47          | -6.33       | 0.000   | -86.87                  | -45.82  |
| <b>intervention</b>                            | 26.97       | 221.14         | 0.12        | 0.903   | -406.46                 | 460.40  |
| <b>change in slope (pre/post intervention)</b> | -150.16     | 27.19          | -6.19       | 0.000   | -203.44                 | -96.88  |
| <b>seasonal change</b>                         | -1264.93    | 200.30         | -6.32       | 0.000   | -1657.48                | -872.38 |
| <b>constant</b>                                | 6484.27     | 70.86          | 91.51       | 0.000   | 6345.39                 | 6623.15 |

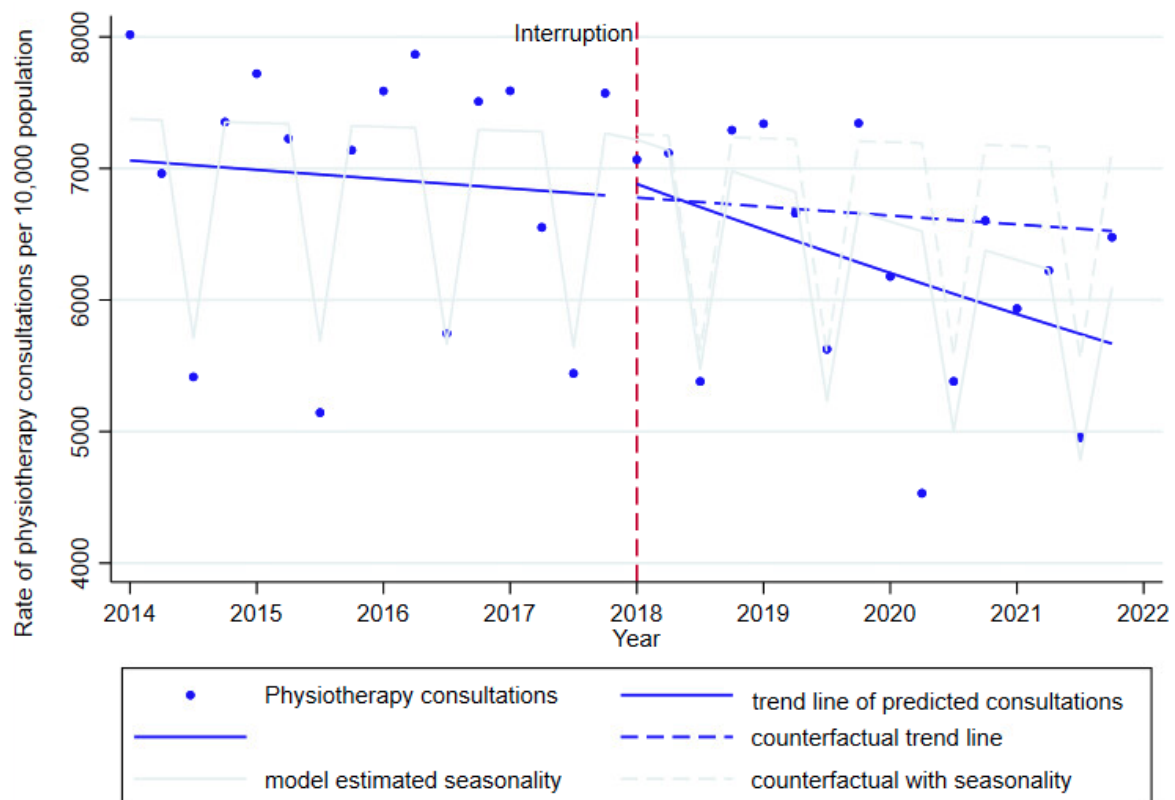

Supplementary figure 2. Rates of physiotherapy MSK consultations in the Intermediate Education group, before and after the introduction of Direct Access Physiotherapy in Norway

Supplementary table 3. Segmented regression analysis of the introduction of Direct Access Physiotherapy on the rates of physiotherapy MSK consultations in the intermediate education group, per 10,000 population in Norway.

| Variable                                       | Coefficient | Standard Error | z statistic | P-Value | 95% Confidence Interval |          |
|------------------------------------------------|-------------|----------------|-------------|---------|-------------------------|----------|
| <b>change over time</b>                        | -38.85      | 13.99          | -2.78       | 0.005   | -66.27                  | -11.42   |
| <b>intervention</b>                            | 37.42       | 200.32         | 0.19        | 0.853   | -355.21                 | 430.05   |
| <b>change in slope (pre/post intervention)</b> | -70.91      | 22.49          | -3.29       | 0.001   | -115.00                 | -26.81   |
| <b>seasonal change</b>                         | -1564.52    | 166.63         | -9.39       | 0.000   | -189.12                 | -1237.92 |
| <b>constant</b>                                | -6591.60    | 89.83          | 73.38       | 0.000   | 6415.54                 | 6767.66  |

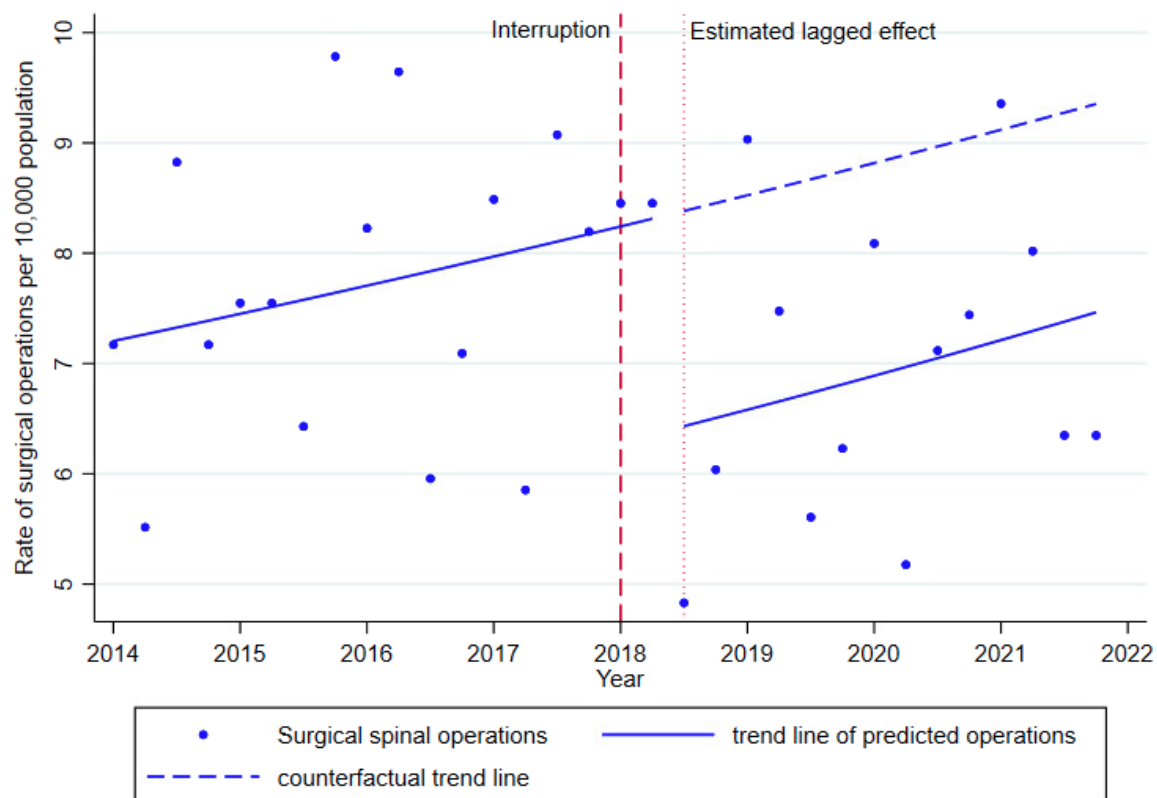

Supplementary figure 3. Age standardised rates of spinal operations for those aged 40 to 60 before and after the introduction of Direct Access Physiotherapy in Norway

Supplementary table 4. Segmented regression analysis of the introduction of Direct Access Physiotherapy on the rates of spinal operations in those aged 40 to 60, per 10,000 population in Norway

| Variable                                       | Coefficient | Standard Error | z statistic | P-Value | 95% Confidence Interval |       |
|------------------------------------------------|-------------|----------------|-------------|---------|-------------------------|-------|
| <b>change over time</b>                        | 0.07        | 0.03           | 2.23        | 0.026   | 0.01                    | 0.13  |
| <b>intervention</b>                            | -1.94       | 0.62           | -3.15       | 0.002   | -3.16                   | -0.74 |
| <b>change in slope (pre/post intervention)</b> | 0.003       | 0.008          | 0.34        | 0.735   | -0.10                   | 0.11  |
| <b>constant</b>                                | 7.39        | 0.13           | 56.46       | 0.000   | 7.14                    | 7.65  |
